# Supplementary material for: Novel synthesis of highly monodispersed γ-Fe2O3/SiO2and ε-Fe2O3/SiO2nanocomposite spheres
Source: Royal Society of Chemistry journal article supplement (doi:10.1039/b604025j), 2006-01-01
Supplement: b604025j.pdf [file b604025j.pdf]

# Novel synthesis of highly monodispersed $\gamma$ -Fe<sub>2</sub>O<sub>3</sub>/SiO<sub>2</sub> and $\epsilon$ -Fe<sub>2</sub>O<sub>3</sub>/SiO<sub>2</sub> nanocomposite spheres

Tadashi Nakamura,\* Yuri Yamada and Kazuhisa Yano

Toyota Central R&D Labs., Inc., 41-1 Yokomichi, Nagakute, Aichi, 480-1192 Japan.

Fax: +81-561-63-6507; Tel: +81-561-63-6259; E-mail: [e1014@mosk.tytlabs.co.jp](mailto:e1014@mosk.tytlabs.co.jp)

## Electronic Supplementary Information

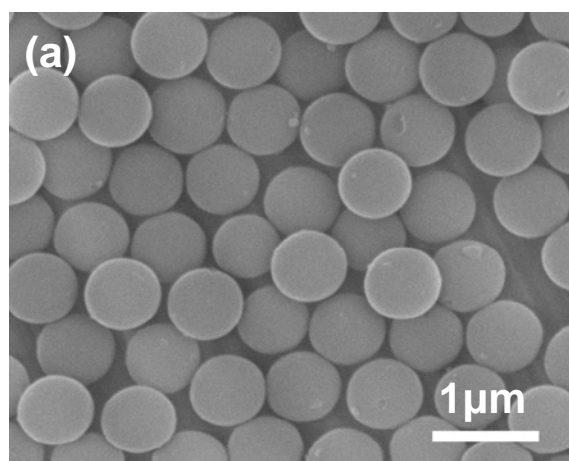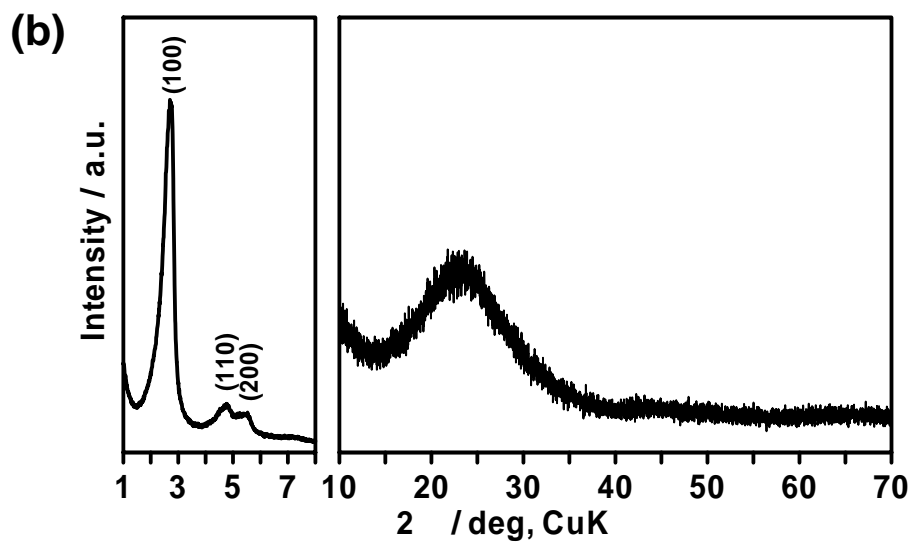

Fig. SI-1. SEM image (a) and XRD pattern (b) for MMSS used in this study.

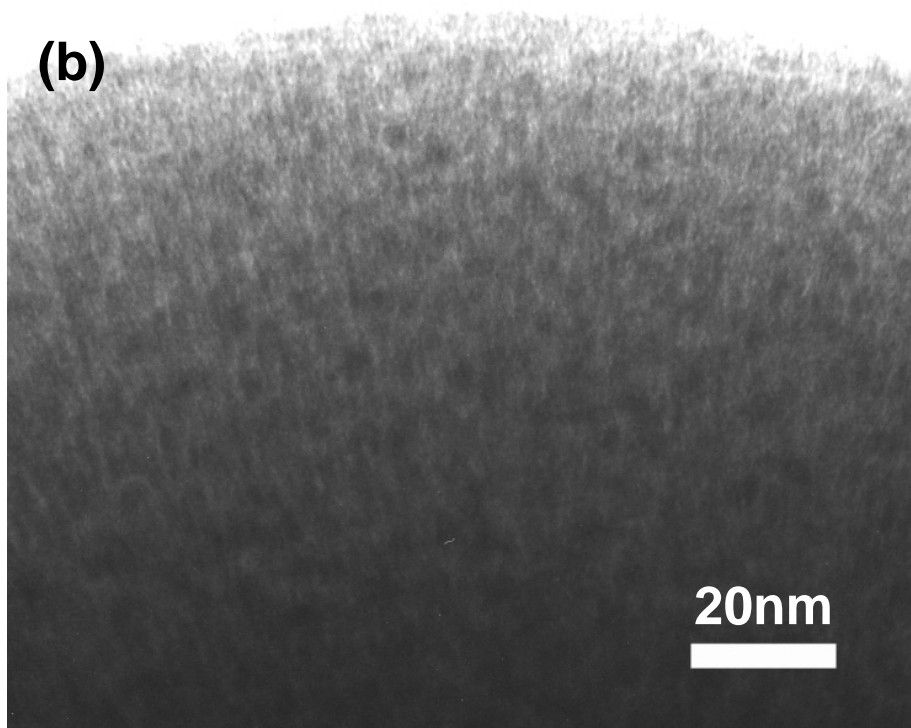

**Fig. SI-2a.** Enlarged TEM images of Fig.1(b).

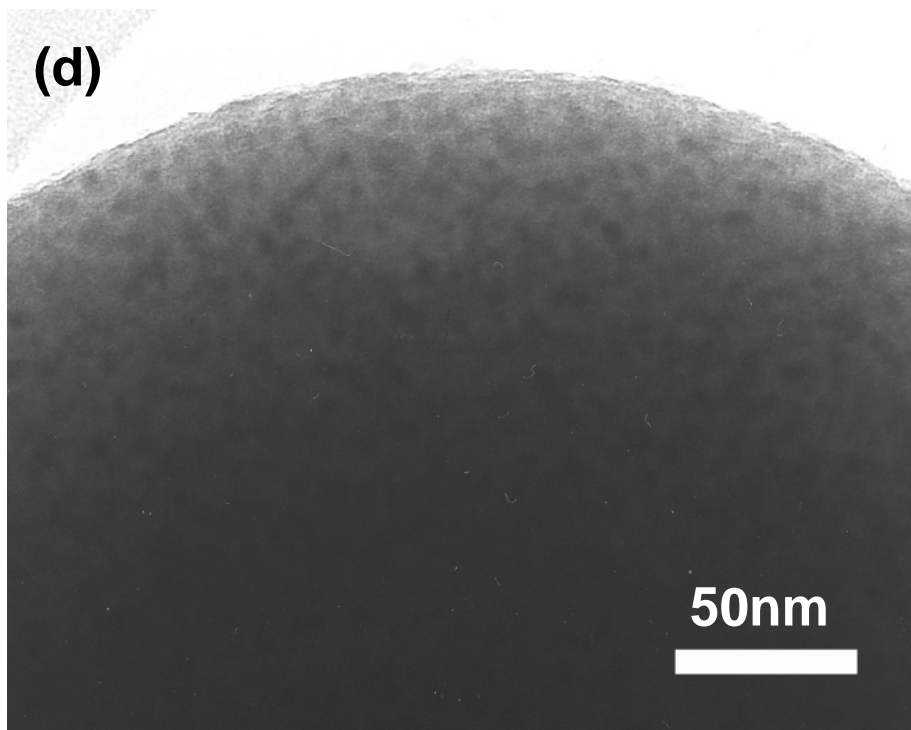

**Fig. SI-2b.** Enlarged TEM images of Fig.1(d).

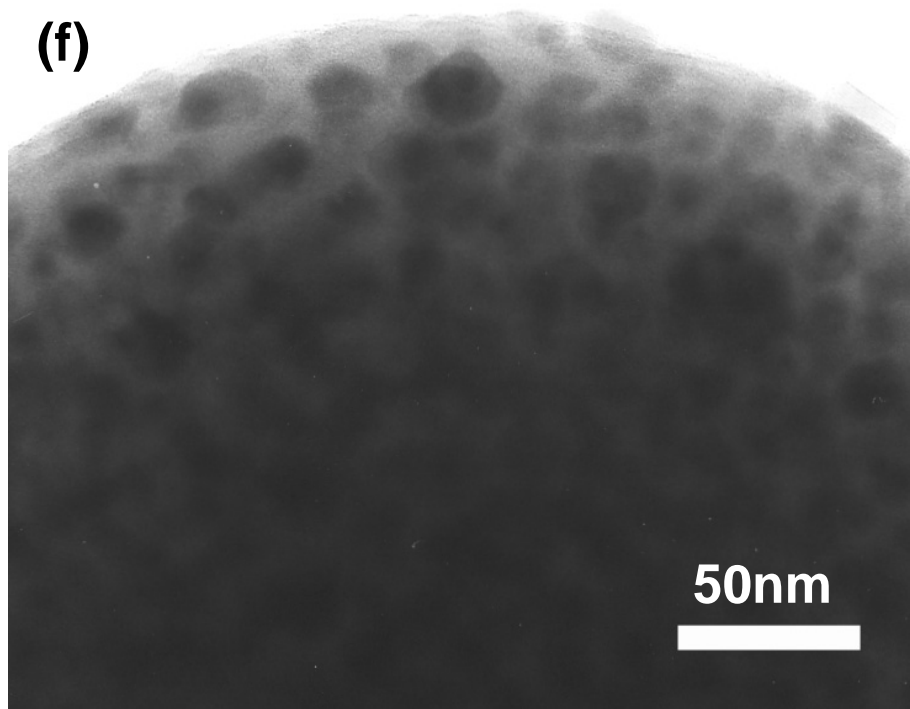

Fig. SI-2c. Enlarged TEM images of Fig.1(f).

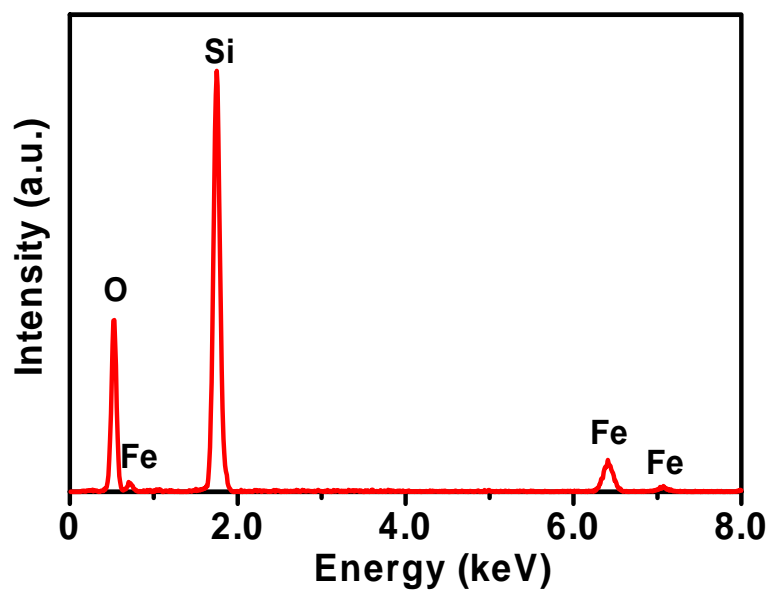

Fig. SI-3. EDX spectrum for nanocomposite spheres calcined at 1273 K.

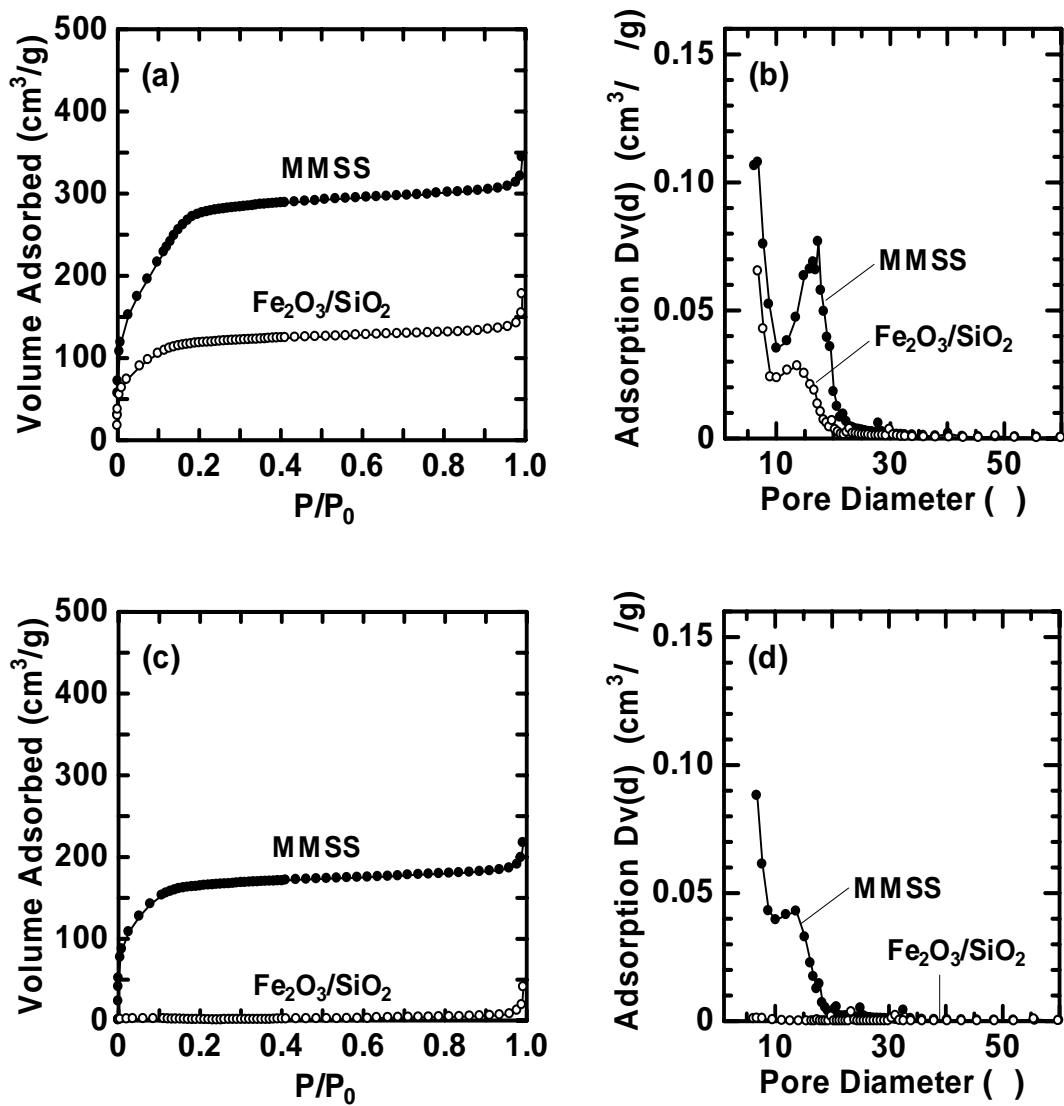

**Fig. SI-4.** N<sub>2</sub> adsorption isotherms (a, c) and corresponding pore size distribution curves (b, d) for MMSS hosts and Fe<sub>2</sub>O<sub>3</sub>/SiO<sub>2</sub> nanocomposite spheres calcined at 1173 K (a, b) and 1273 K (c, d)
